# Supplementary material for: Comparative transcriptomic analysis of human and Drosophila extracellular vesicles
Source: PubMed Central journal article supplement (PMC4901365; doi:10.1038/srep27680), 2016-06-10
Supplement: srep27680-s1.pdf [file srep27680-s1.pdf]

## **SUPPLEMENTAL INFORMATION**

### **Comparative transcriptomic analysis of human and *Drosophila* extracellular vesicles**

**Fabio Alexis Lefebvre<sup>1,2</sup>, Louis Philip Benoit Bouvrette<sup>1,2</sup>, Lilyanne Perras<sup>1,2</sup>, Alexis Blanchet-Cohen<sup>1</sup>, Delphine Garnier<sup>3,4</sup>, Janusz Rak<sup>3</sup>, Éric Lécuyer<sup>1,2,5,\*</sup>**

**1-** Institut de Recherches Cliniques de Montréal (IRCM), Montréal, QC H2W 1R7, Canada

**2-** Département de Biochimie, Université de Montréal, Montréal, QC H3T 1J4, Canada

**3-** Montreal Children's Hospital, Research Institute of the McGill University Health Centre, Montreal, QC H4A 3J1, Canada

**4-** INSERM UMR 1064-ITUN; CHU de Nantes, Nantes 44093, France

**5-** Division of Experimental Medicine, McGill University, Montréal, QC H3A 1A3, Canada

\*- Corresponding author:

Dr. Eric Lécuyer  
IRCM, RNA Biology Laboratory  
110 Avenue des Pins, Ouest  
Montréal, Québec, Canada, H2W 1R7  
Email: [eric.lecuyer@ircm.qc.ca](mailto:eric.lecuyer@ircm.qc.ca)

## **Supplemental Figure Legends**

**Figure S1. EV count per preparation.** EV counts were determined on the basis of NTA analysis, considering total particles in cultures established from  $10^7$  cells over the course of 48h. The significance of the differences observed between lines of the same species was evaluated through a Mann-Whitney test, while the prevalence of a global difference was evaluated using a Kruskal-Wallis test. Differences are deemed non-significant.

**Figure S2. Human and *Drosophila* EVs contain similar amounts of proteins and RNA.** Quantification of total protein (**left panel**) and RNA (**right panel**) in EV preparations derived from human and *Drosophila* cells. No significant difference was found across samples by an ANOVA test.

**Figure S3. Average protein and RNA content per individual EV.** Estimations of total protein (top panel) and RNA (bottom panel) mass found in individual EV were obtained from results of photometric macromolecule quantification and NTA vesicle counts. The significance of the differences observed between lines of the same species was evaluated through a Mann-Whitney test while the prevalence of a global difference was evaluated using a Kruskal-Wallis test. One femtogram (fg) corresponds to  $10^{-15}$  g, while one attogram (ag) corresponds to  $10^{-18}$  g.

**Figure S4. The bulk of RNA found in human and *Drosophila* EVs is protected from degradation by RNase A.** EV preparations derived from human HepG2 and A431 and *Drosophila* D17 and S2R+ cells were split in two equal pools. The first pool (grey bars) was incubated with RNase A followed by inactivation and total RNA extraction, while the second pool (black bars) was directly submitted to RNA extraction. Previously quantified samples of cellular HepG2 and D17 total RNA were used as controls.

**Figure S5. RNA in human and *Drosophila* EVs largely consists of short sequences.** Length distributions of human and *Drosophila* EV (**left panels**) and cellular (**right panels**) total RNA were evaluated by bioanalyzer capillary electrophoresis. ‘R’ refers to the 18S and 28S rRNA peaks, while ‘M’ refers to the exogenous marker peak.

**Figure S6. Bidirectional read distributions map to 5S pseudogenes in human HepG2 EVs.** Strand-specific read coverage of the genomic region surrounding the *RNA5SP145* (chr3:150,905,886-150,906,010, **top panel**) and *RNA5SP149* (chr3:179,879,674-179,879,765; **bottom panel**) in human HepG2 EVs and cells. The y-axis refers to read coverage (no normalization). Screen shots were taken from the UCSC genome browser.

**Figure S7. Mitochondrial rRNAs display abundant bidirectional read coverage in HepG2 EVs and cells.** Strand-specific read coverage of the genomic region surrounding the 12S (*MT-RNR1*; chrM:650-1,603) and 16S (*MT-RNR2*; chrM:1,673-3,230) loci in human HepG2 EVs and cells. Note that rRNA depletion was performed prior to RNA-seq in HepG2 cellular extracts.

**Figure S8. Abundant bidirectional signatures of an rRNA-like novel miRNA in human HepG2 EVs.** Strand-specific read coverage of the genomic region surrounding the *AC079949.1*

“novel miRNA” locus in human HepG2 EVs and cells. This miRNA overlaps with a large subunit rRNA repeat (chr12:127,650,453-127,650,987), H3K27 acetylated and DNase I sensitive region.

**Figure S9. Abundant full-length read distributions map to vault RNA 1-1 in HepG2 EVs.** Strand-specific read coverage surrounding the *VTRNA1-1* locus (chr5:140,090,861-140,090,958) in HepG2 EVs and cells.

**Figure S10. Spliceosomal U5 snRNAs are abundant in human and *Drosophila* EVs.** Strand-specific read coverage of a *Drosophila* U5 snRNA gene (*U5:63BC*; chr3L:3,090,801-3,090,923) and a human ortholog (*RNU5B-1*; chr15:65,597,015-65,597,130) in D17 (A) and HepG2 (B) EVs and cells.

**Figure S11. Intronic snoRNAs display differential targeting to *Drosophila* EVs.** Strand-specific read coverage of three snoRNAs encoded from intronic regions of *CG13900* (chr3L:826,720-833,385 ) in *Drosophila* EVs and cells.

**Figure S12. Evidence of tRNA targeting to *Drosophila* and human EVs.** Strand-specific read coverage of two proximal *Drosophila* tRNAs (chr2L:8,683,381-8,683,935; **top panel**) and two human tRNAs (chr12:125,423,890-125,425,085; **bottom panel**). The latter example shows evidence of bidirectional tRNA sequences in EVs and asymmetric read coverage in EVs and cells.

**Figure S13. A narrow read distribution maps to a central region of the retrotransposon *TART* in *Drosophila* EVs and cells.** Strand-specific read coverage of the *TART* locus (chrX:15,069-25,164) in *Drosophila* EVs and cells.

**Figure S14. A narrow antisense read distribution maps to a central region of the retrotransposon *Copia* in *Drosophila* EVs.** Strand-specific read coverage surrounding a *Copia* element repeat (chr2L:2,294,373-2,298,967) in *Drosophila* S2R+ EVs, D17 EVs and D17 cells.

**Figure S15. Correlative analysis of orthologous protein-coding genes.** Relative TPM abundance values of *Drosophila* D17 mRNAs were correlated to their corresponding human HepG2 orthologs. Cellular (**top panel**) and EV (**bottom panel**) populations are displayed as scatter plots. Pearson’s correlations (r) and associated p-values are indicated at the top of each graph.

## **Supplemental Table Legends**

**Table S1. Read distributions of the fifty most abundant rRNA genes in human and *Drosophila* EV samples.**

**Table S2. List of the ten most abundant transcripts in human and *Drosophila* EV samples following rRNA subtraction.**

**Table S3. List of the ten most abundant repeat element-derived RNAs in human and *Drosophila* EVs.**

**Table S4. List of the ten most abundant mRNAs in human and *Drosophila* EVs.**

**Table S5. List of the ten most significantly enriched gene ontology (GO) terms associated with human and *Drosophila* EV mRNAs.**

**Table S6. Exhaustive list of “EV-exclusive” mRNAs in human HepG2 and *Drosophila* D17 cells.**

Figure S1

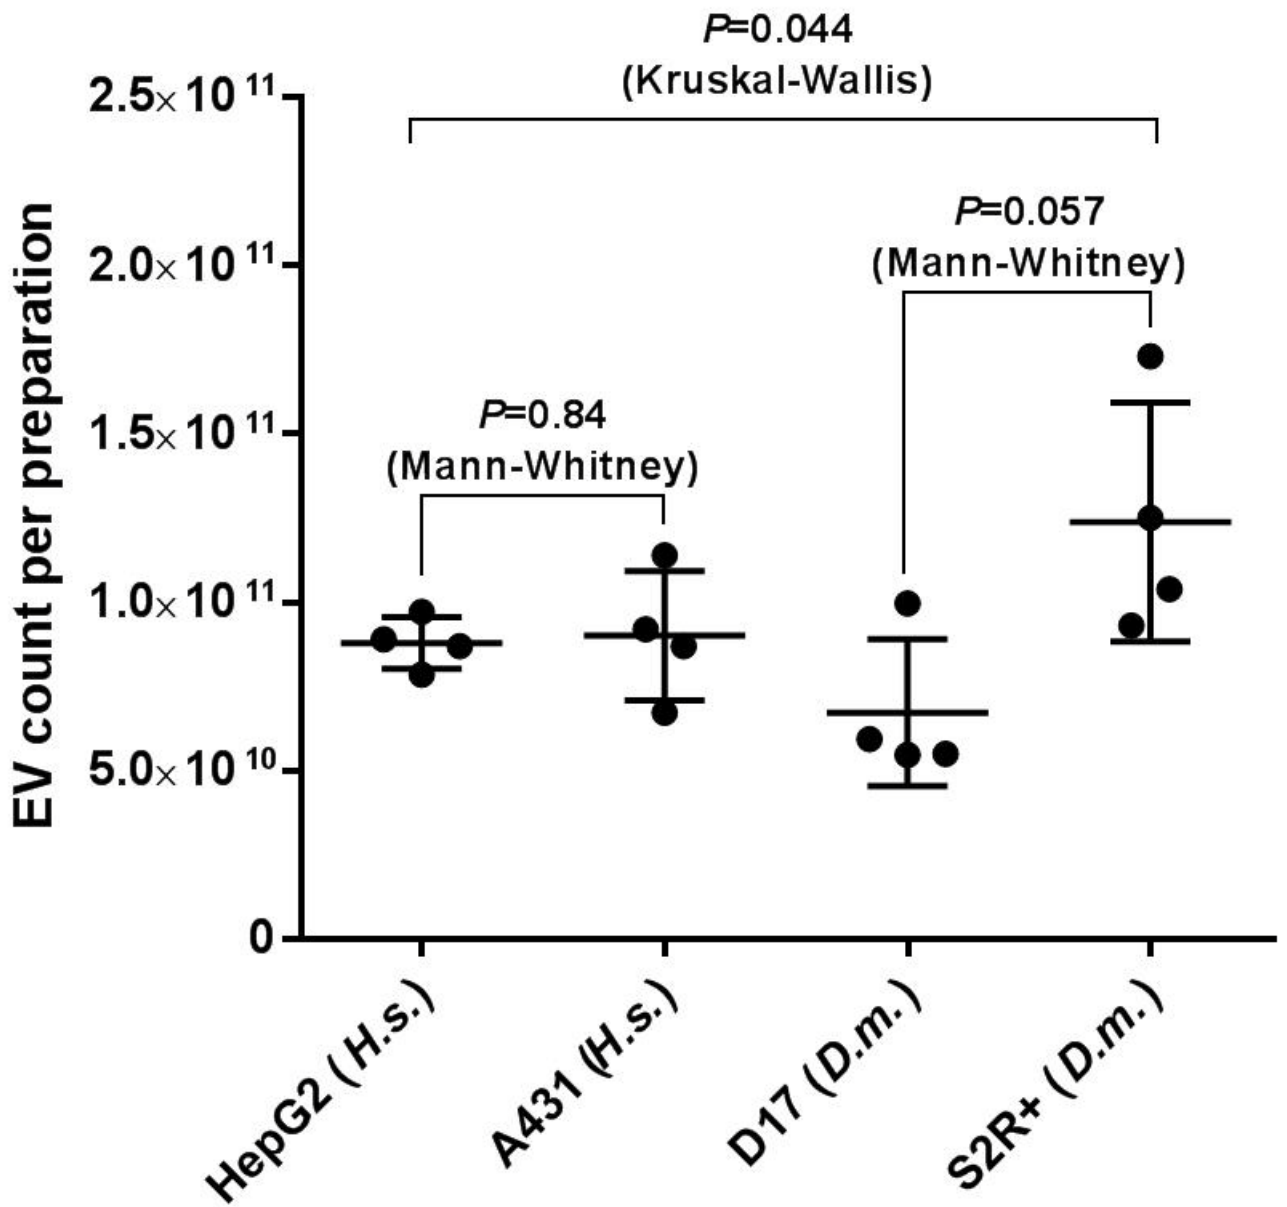

Figure S2

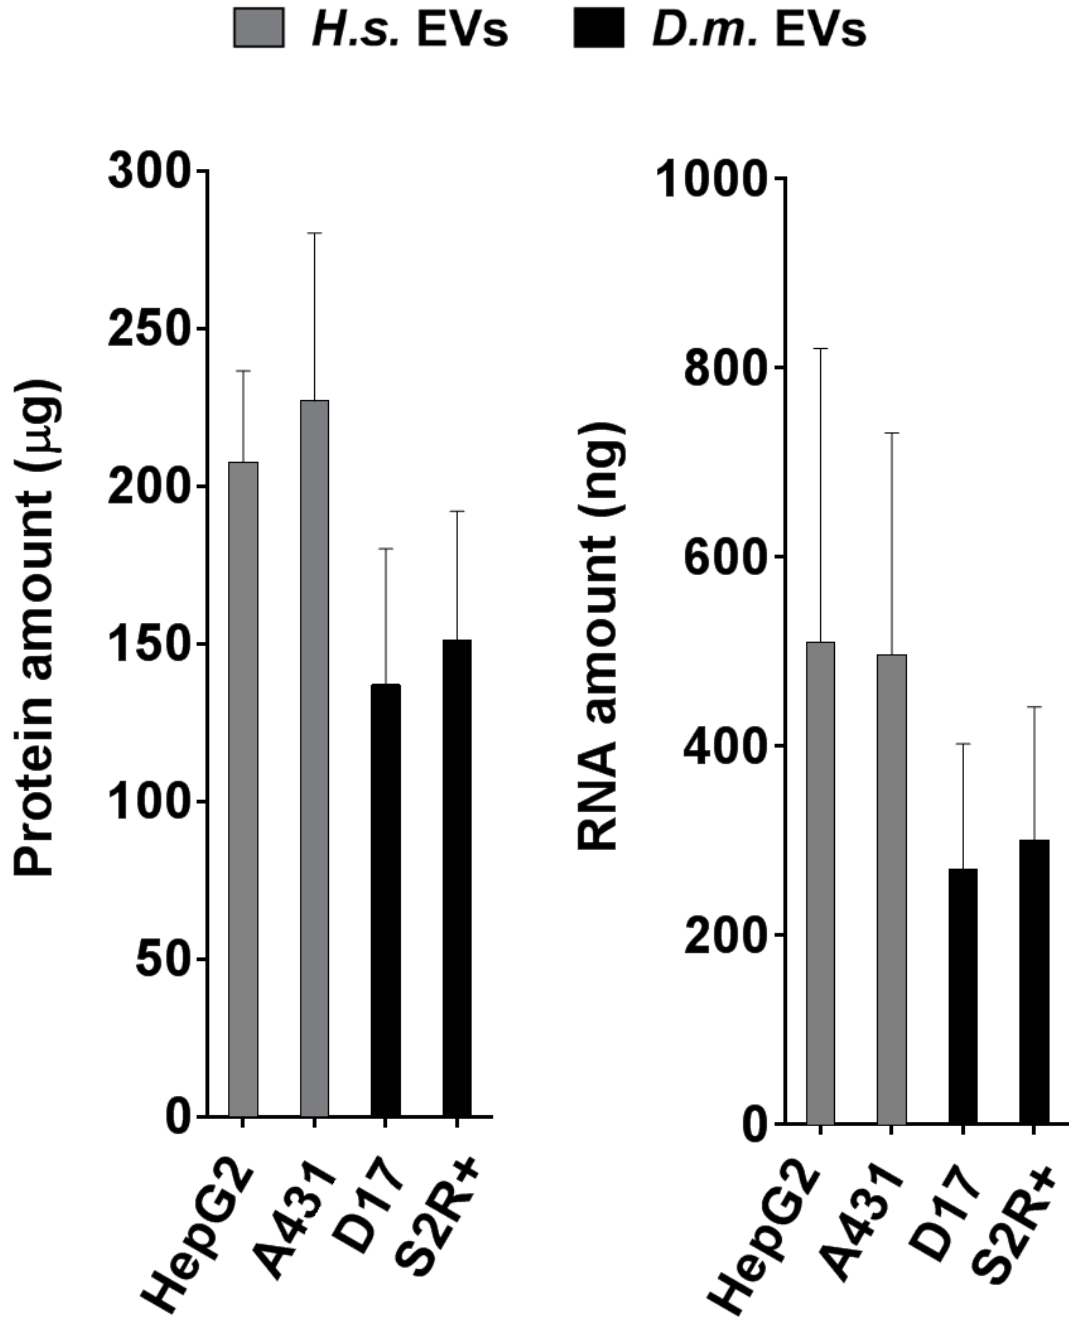

# Figure S3

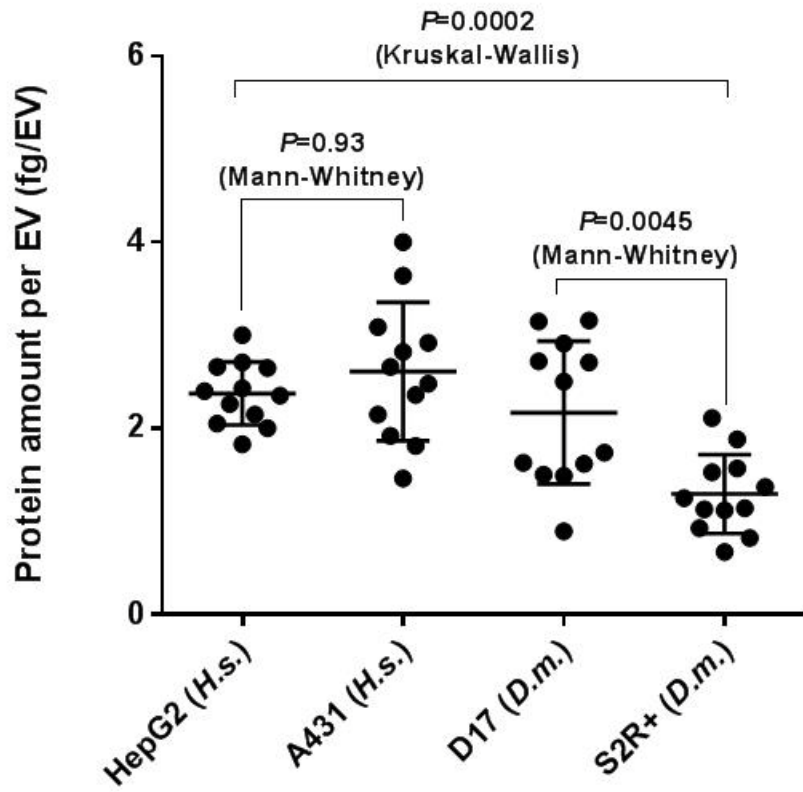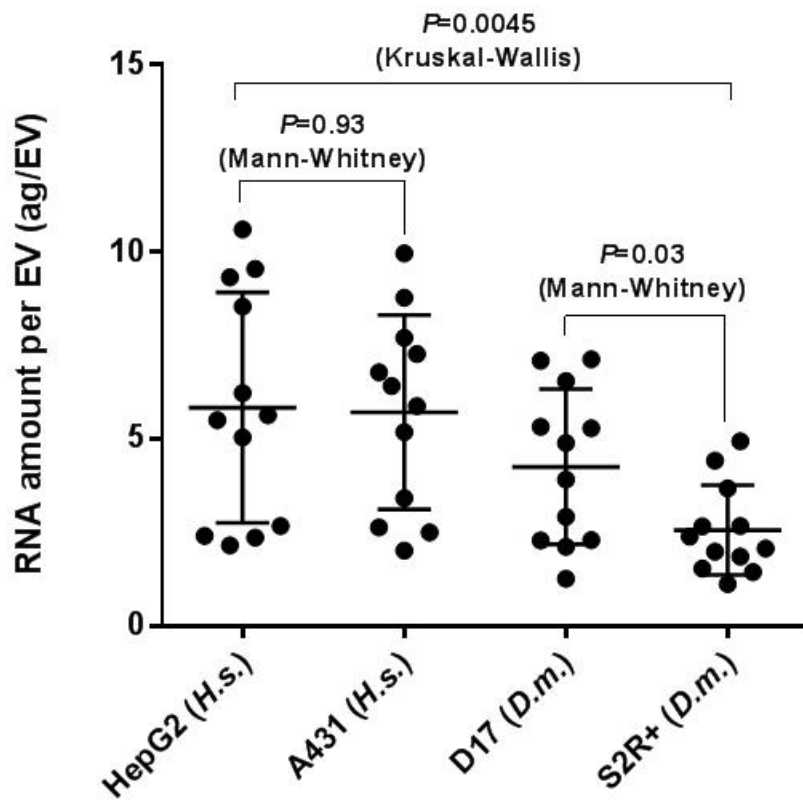

Figure S4

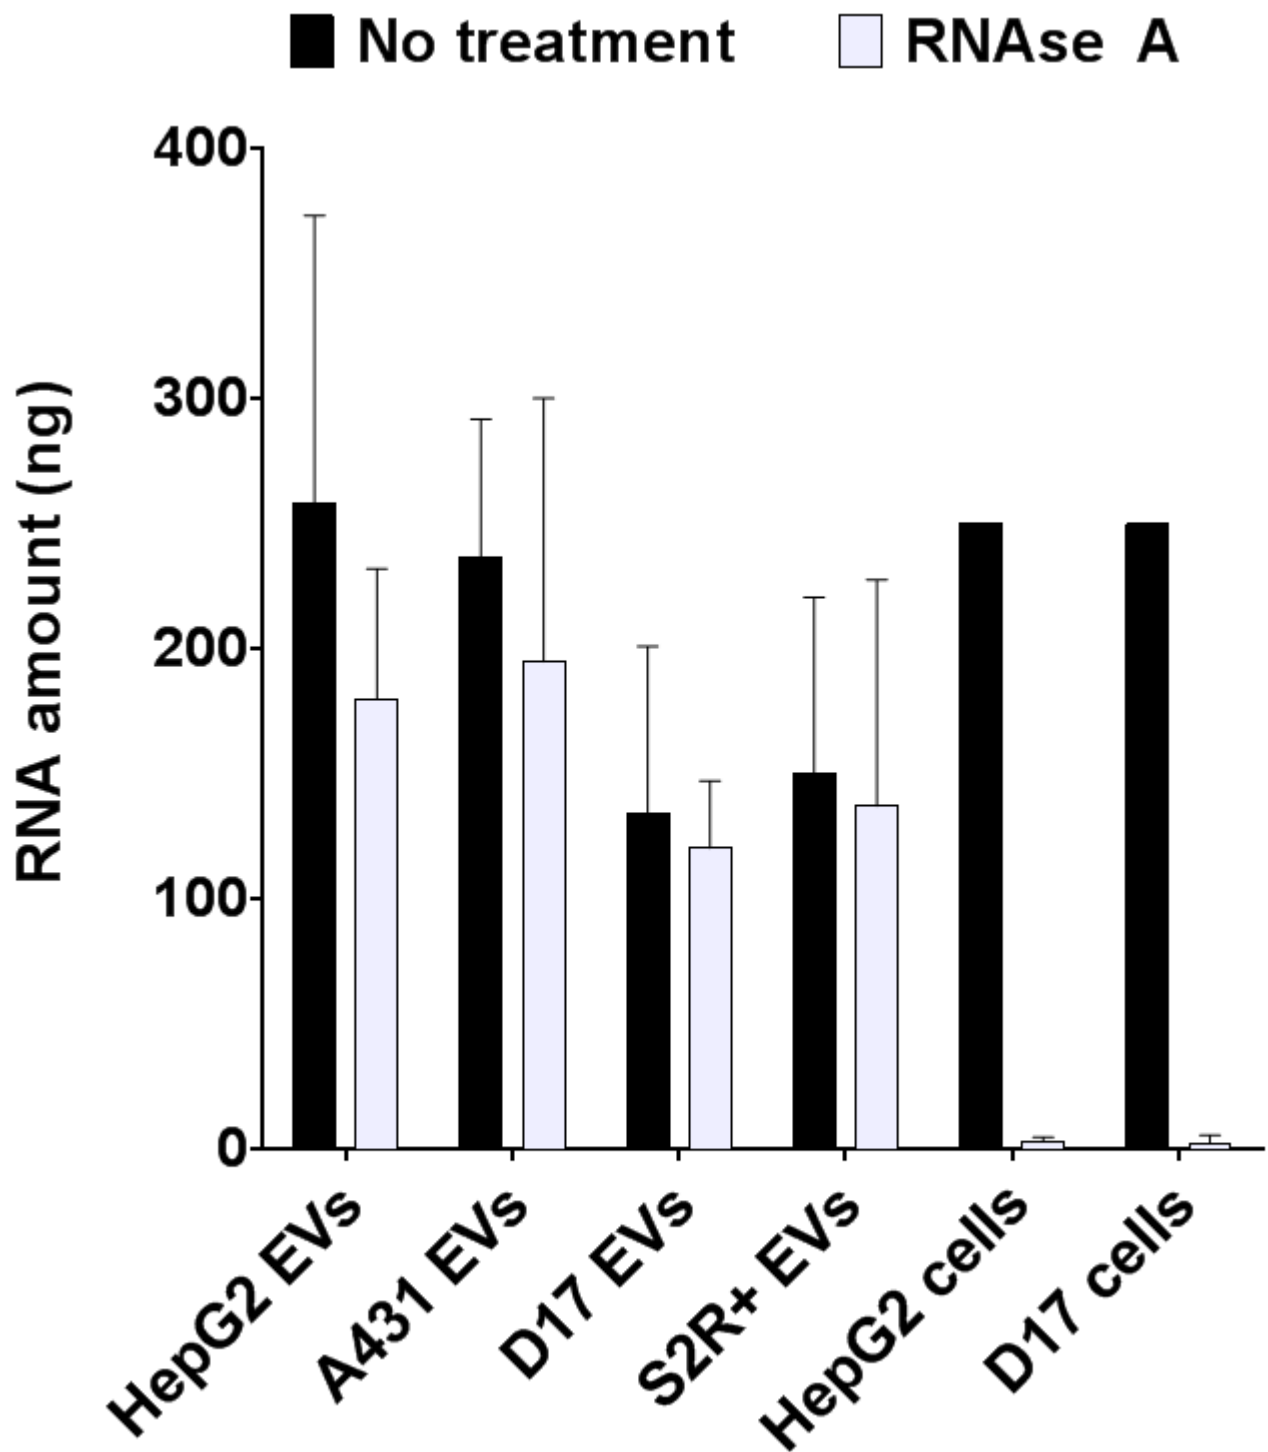



**Figure S5**

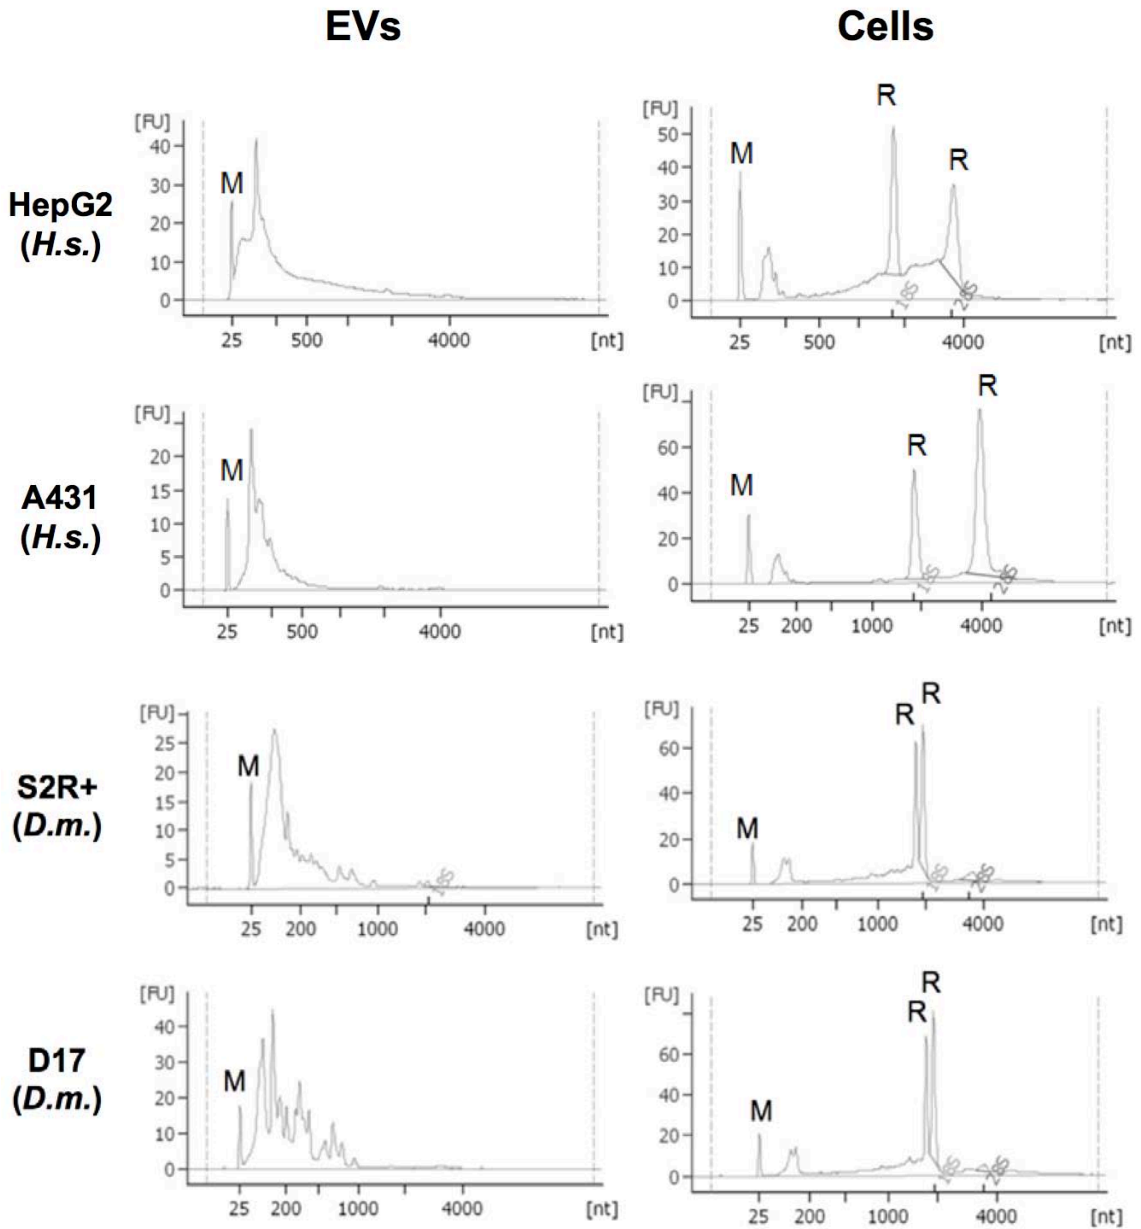

# Figure S6

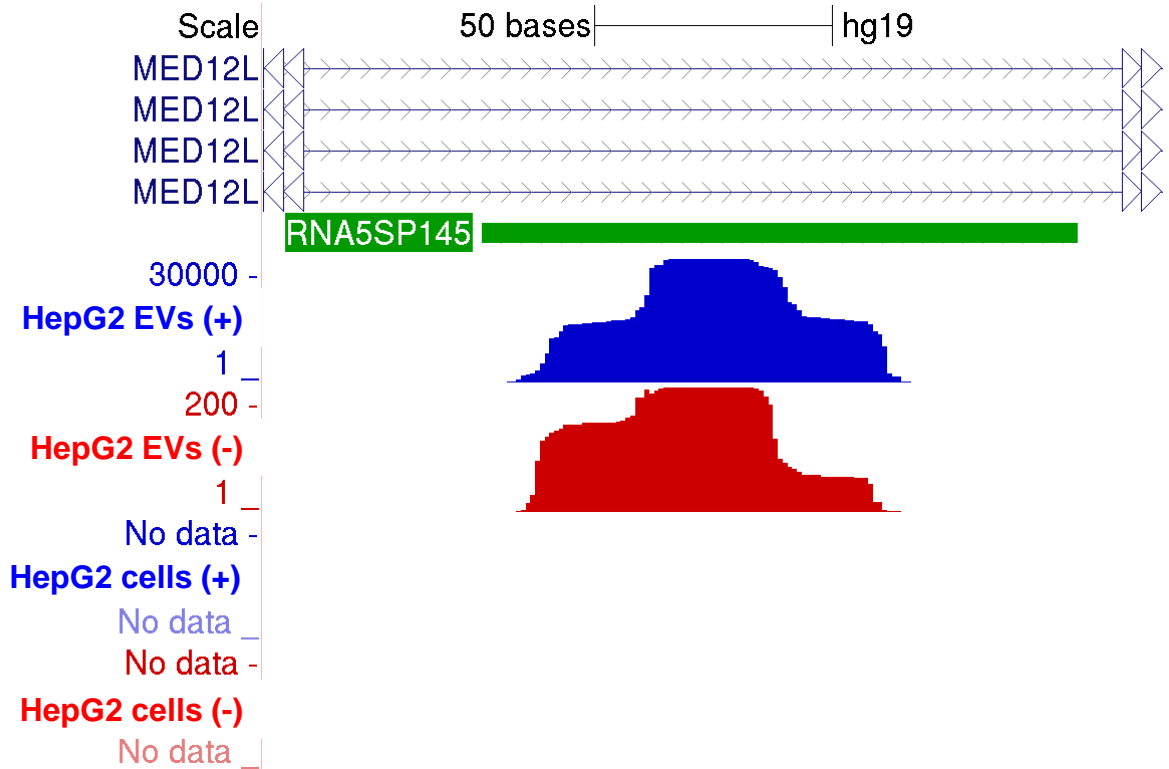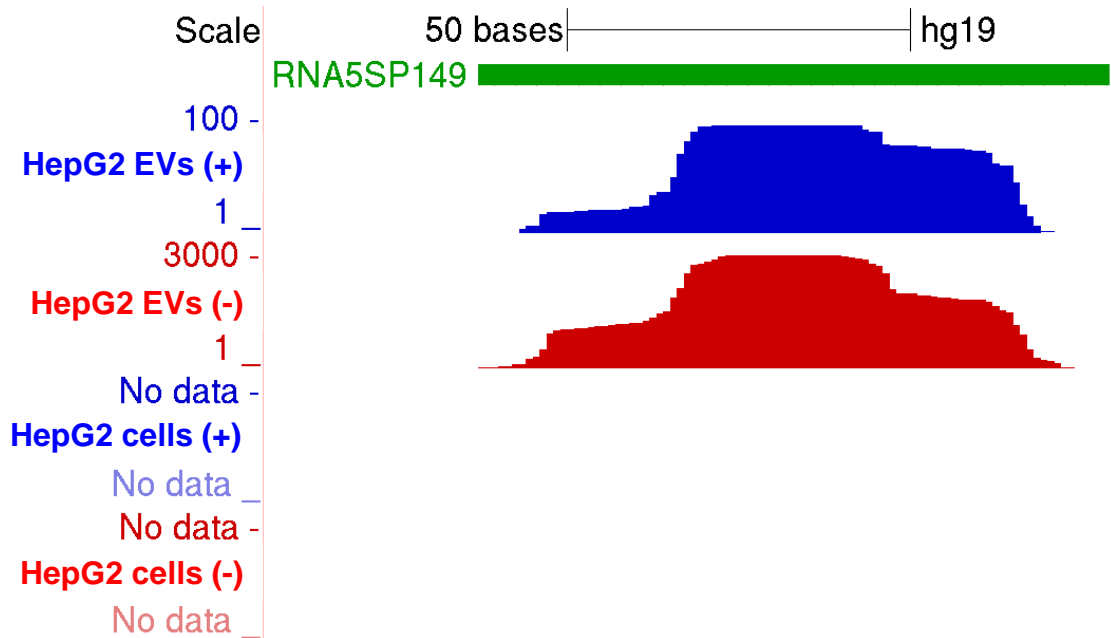

**Figure S7**

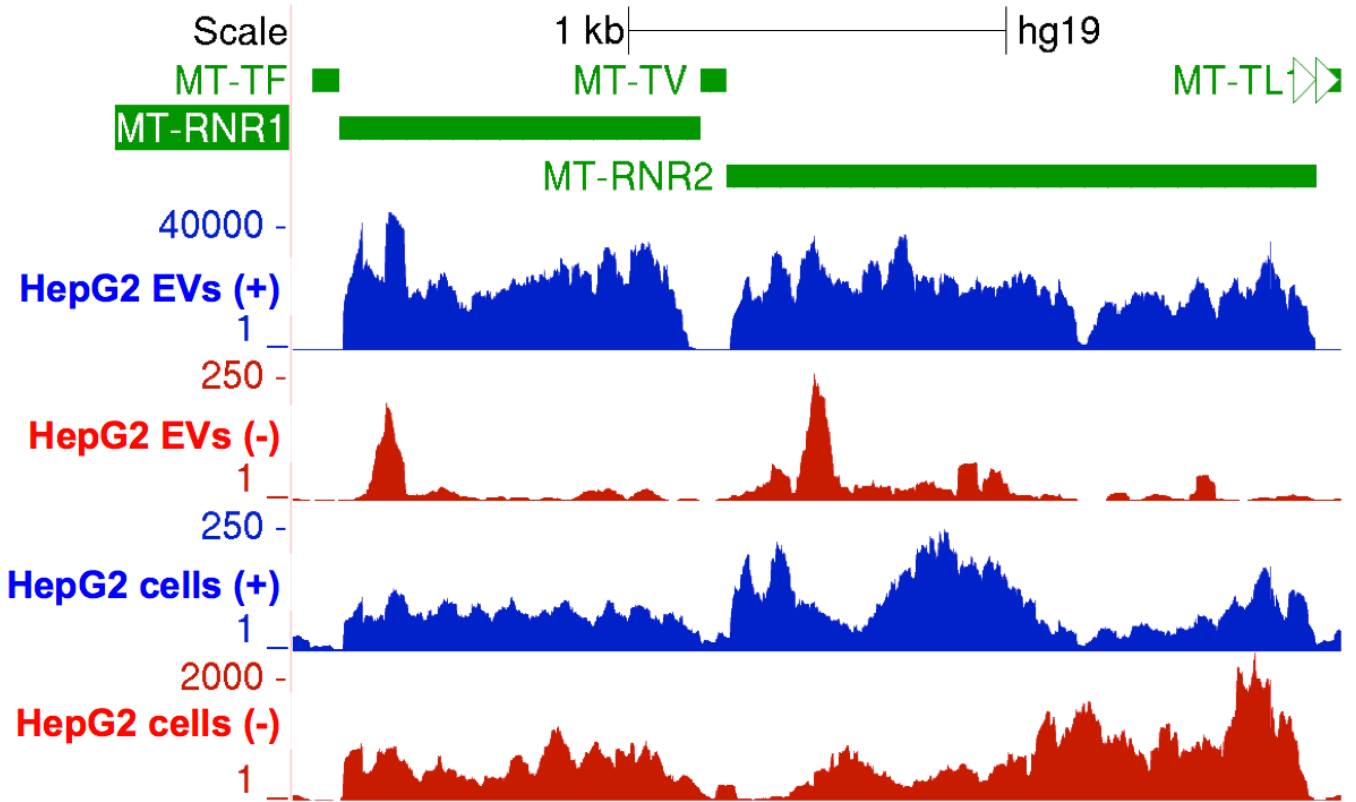

# Figure S8

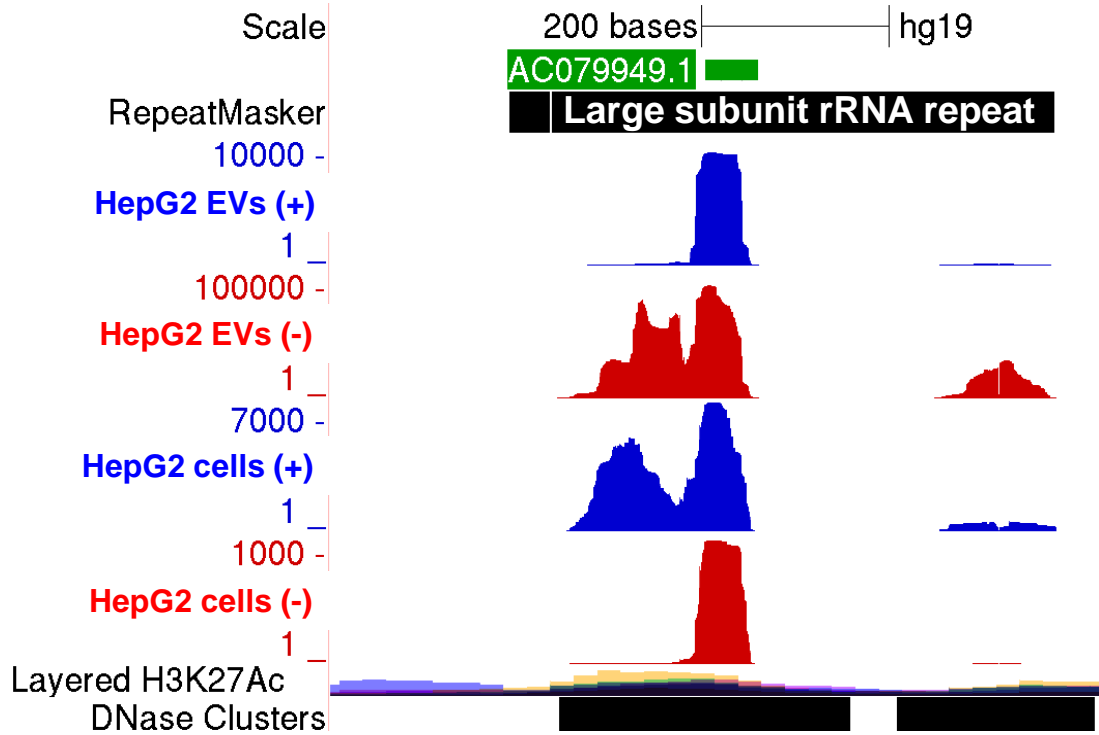

# Figure S9

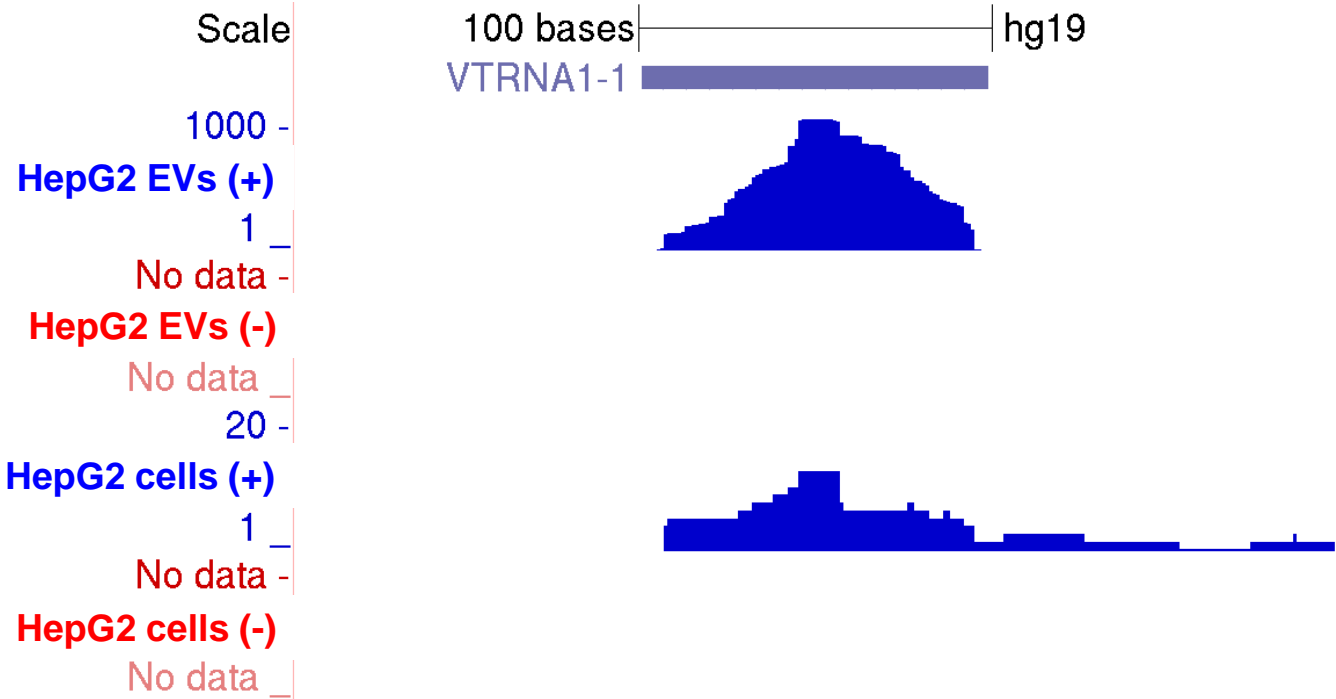

# Figure S10

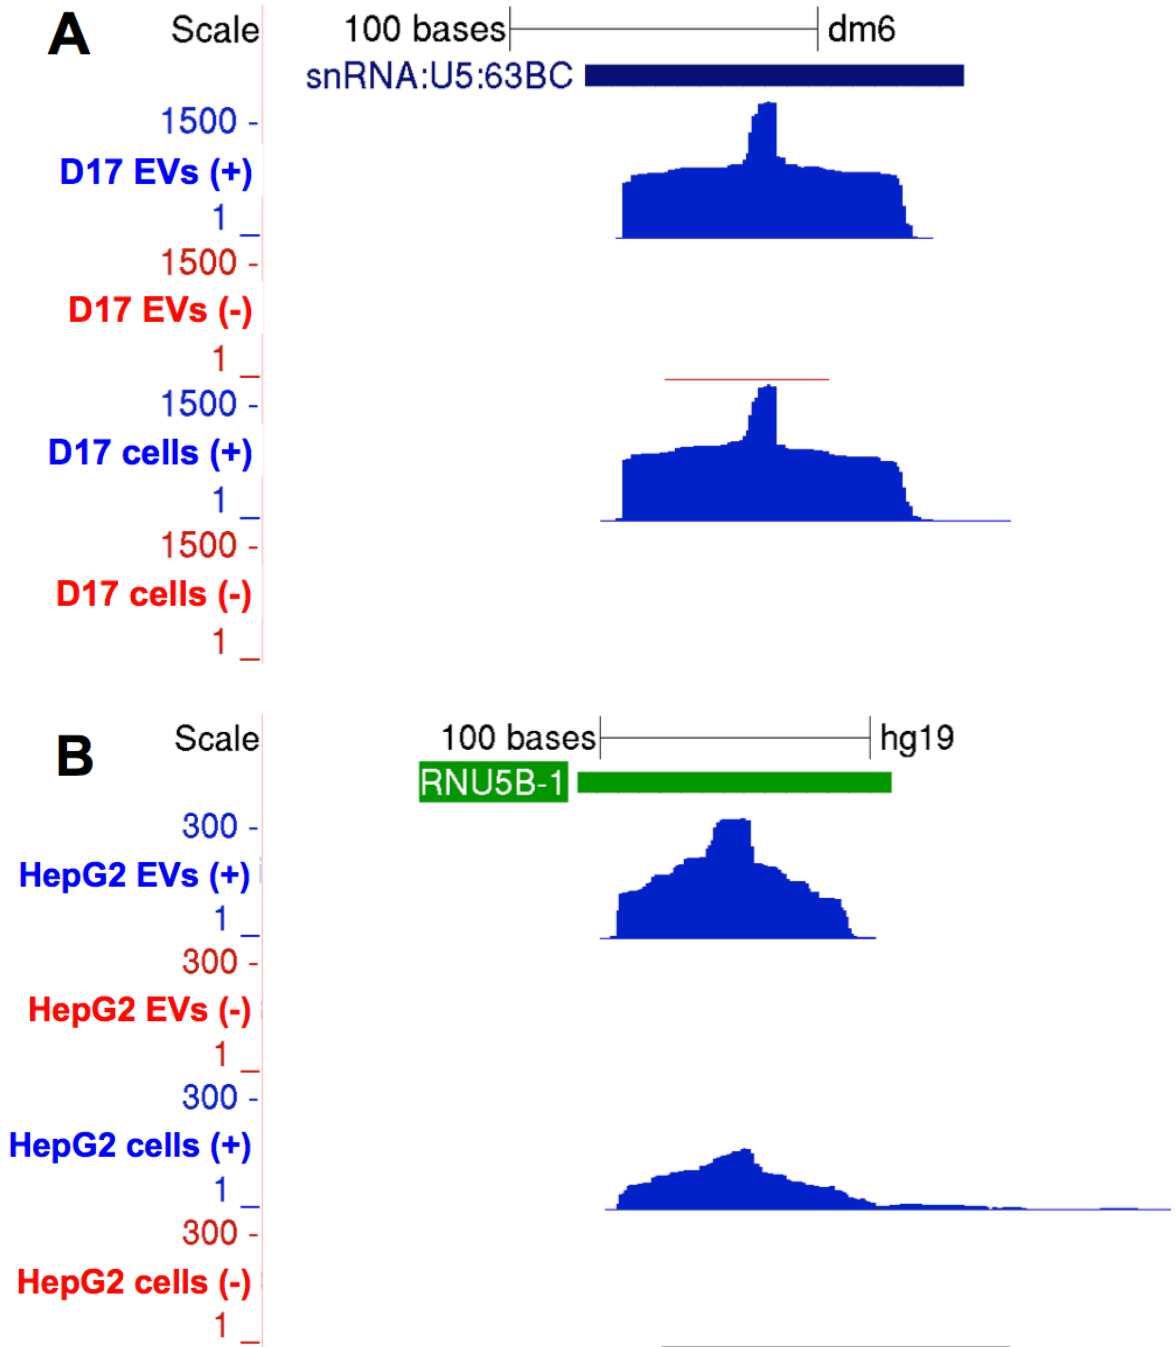

**Figure S11**

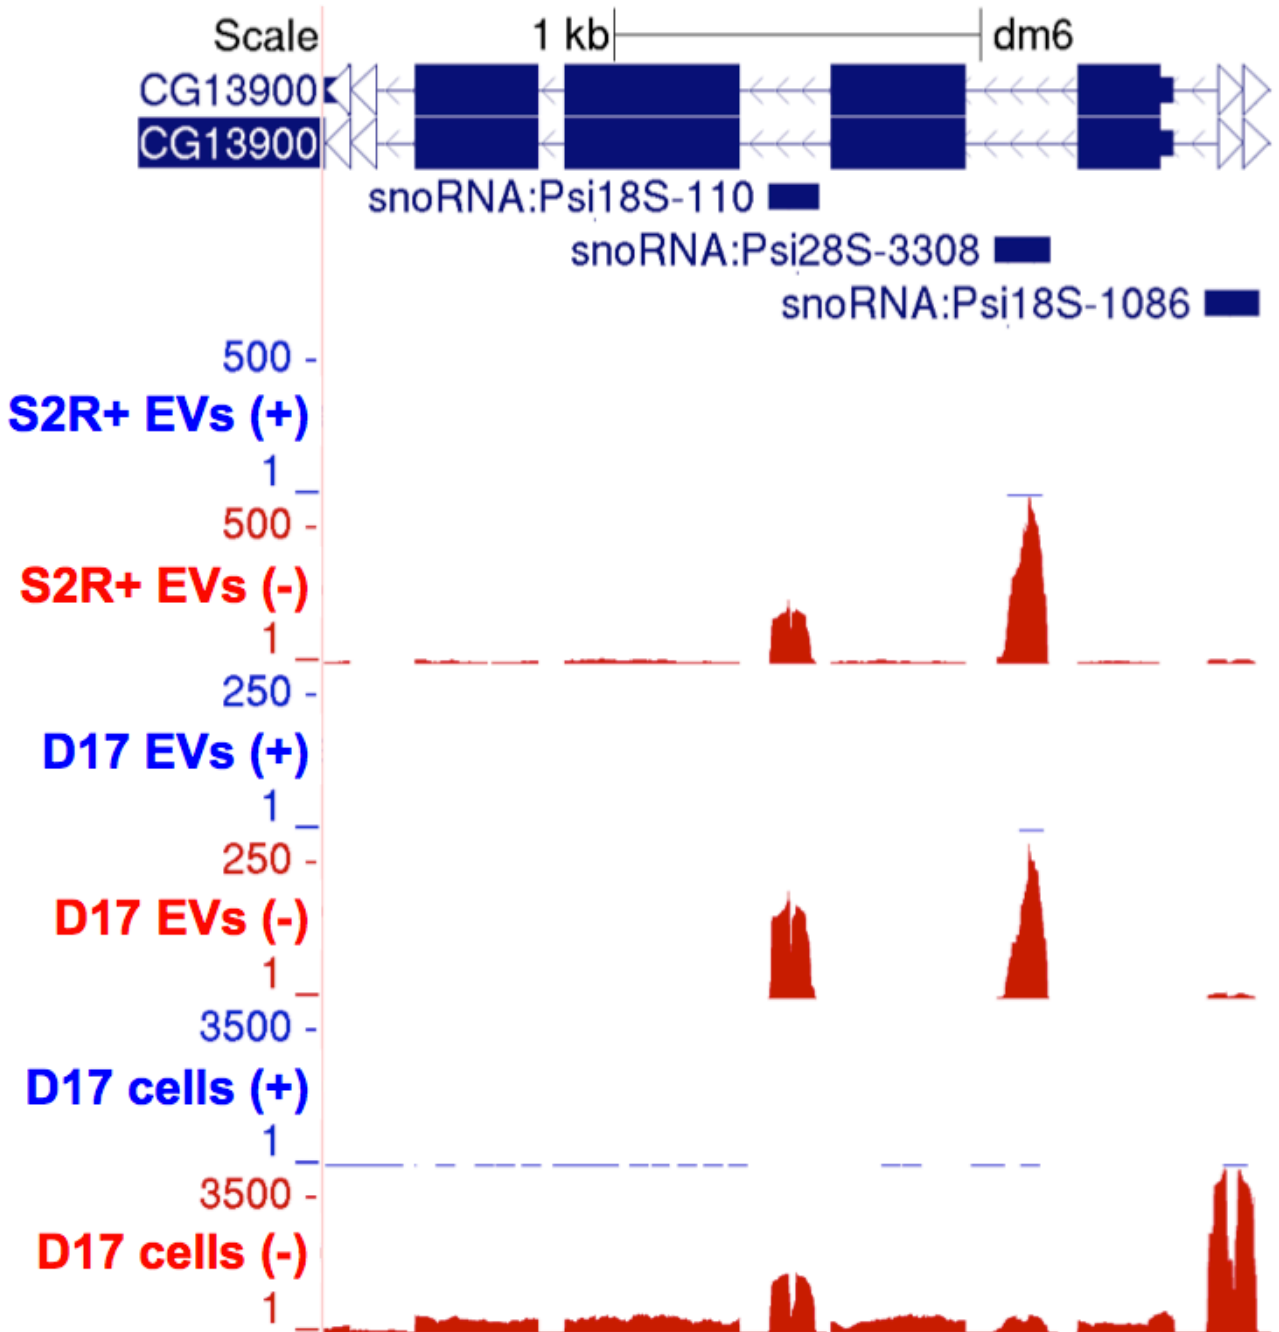

# Figure S12

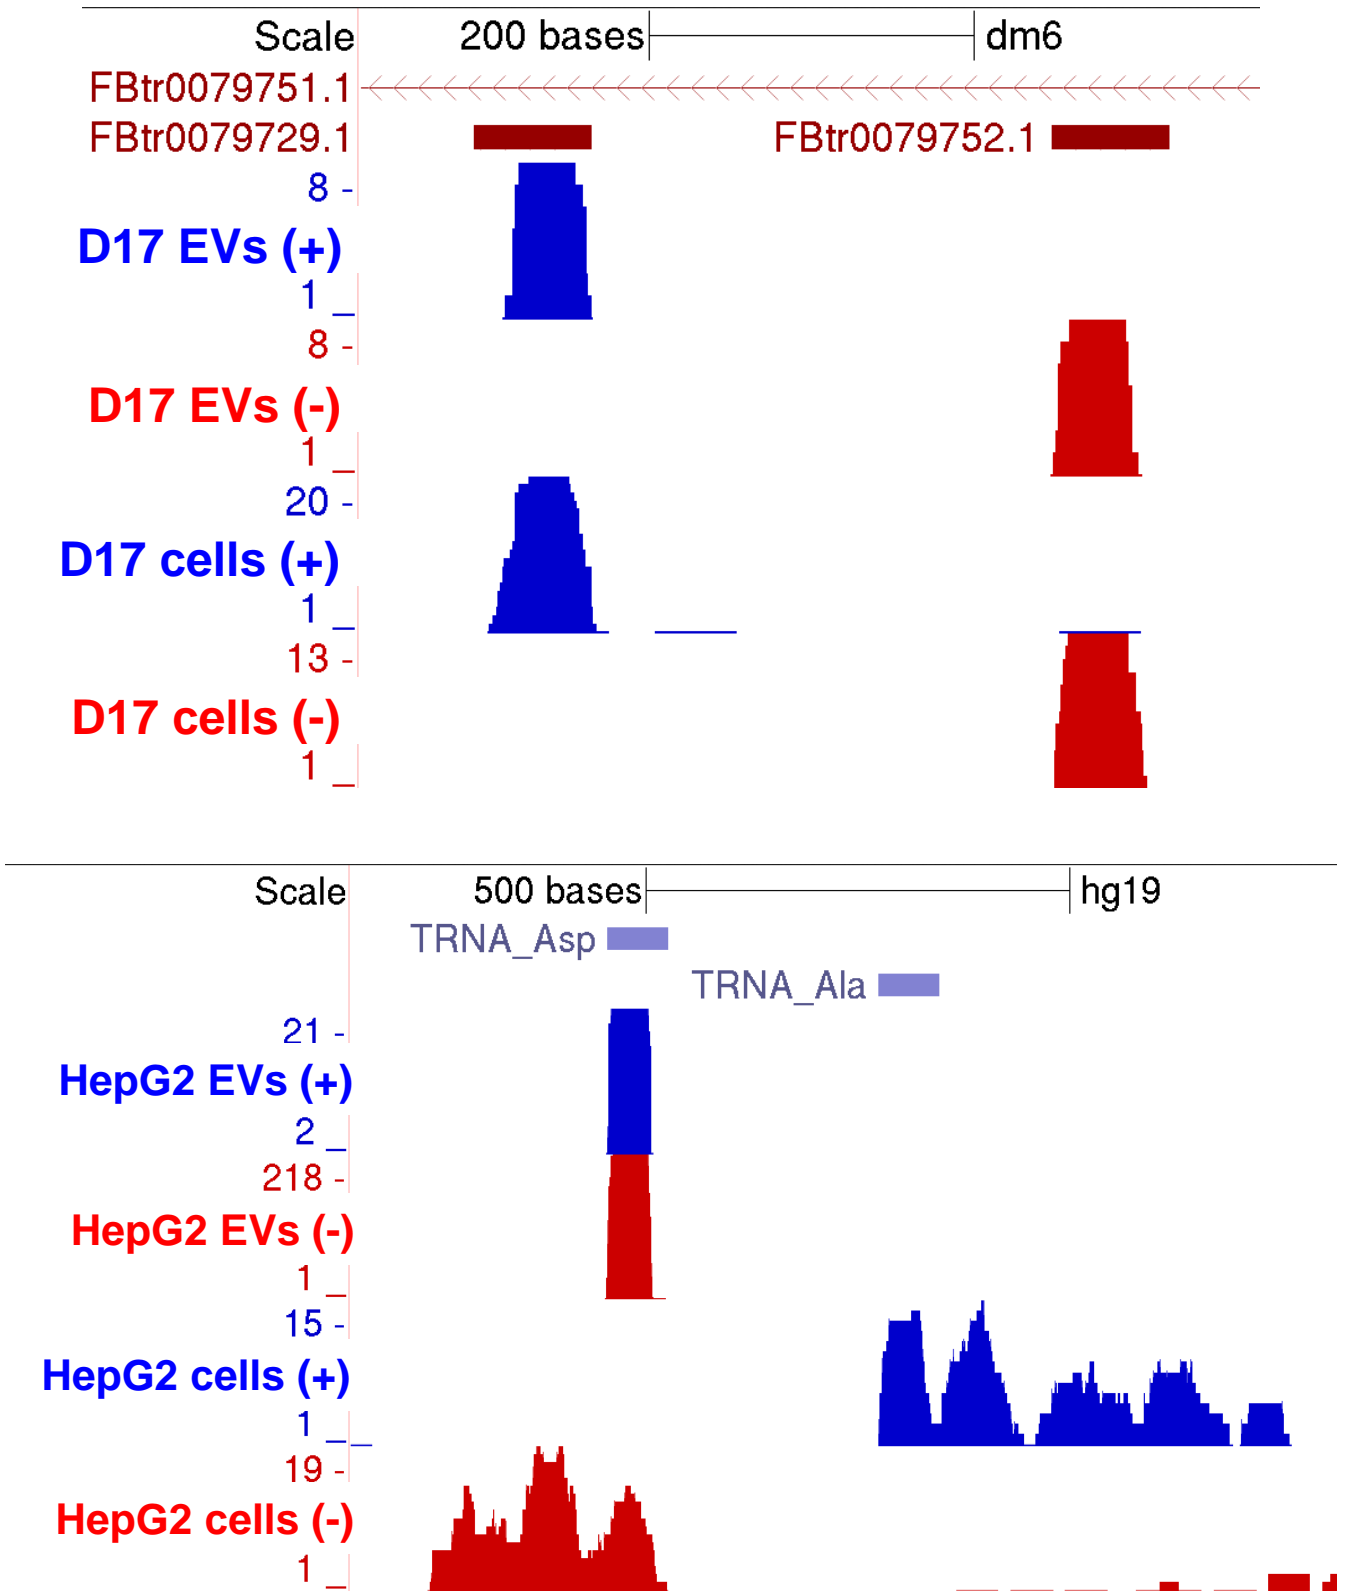



Figure S13

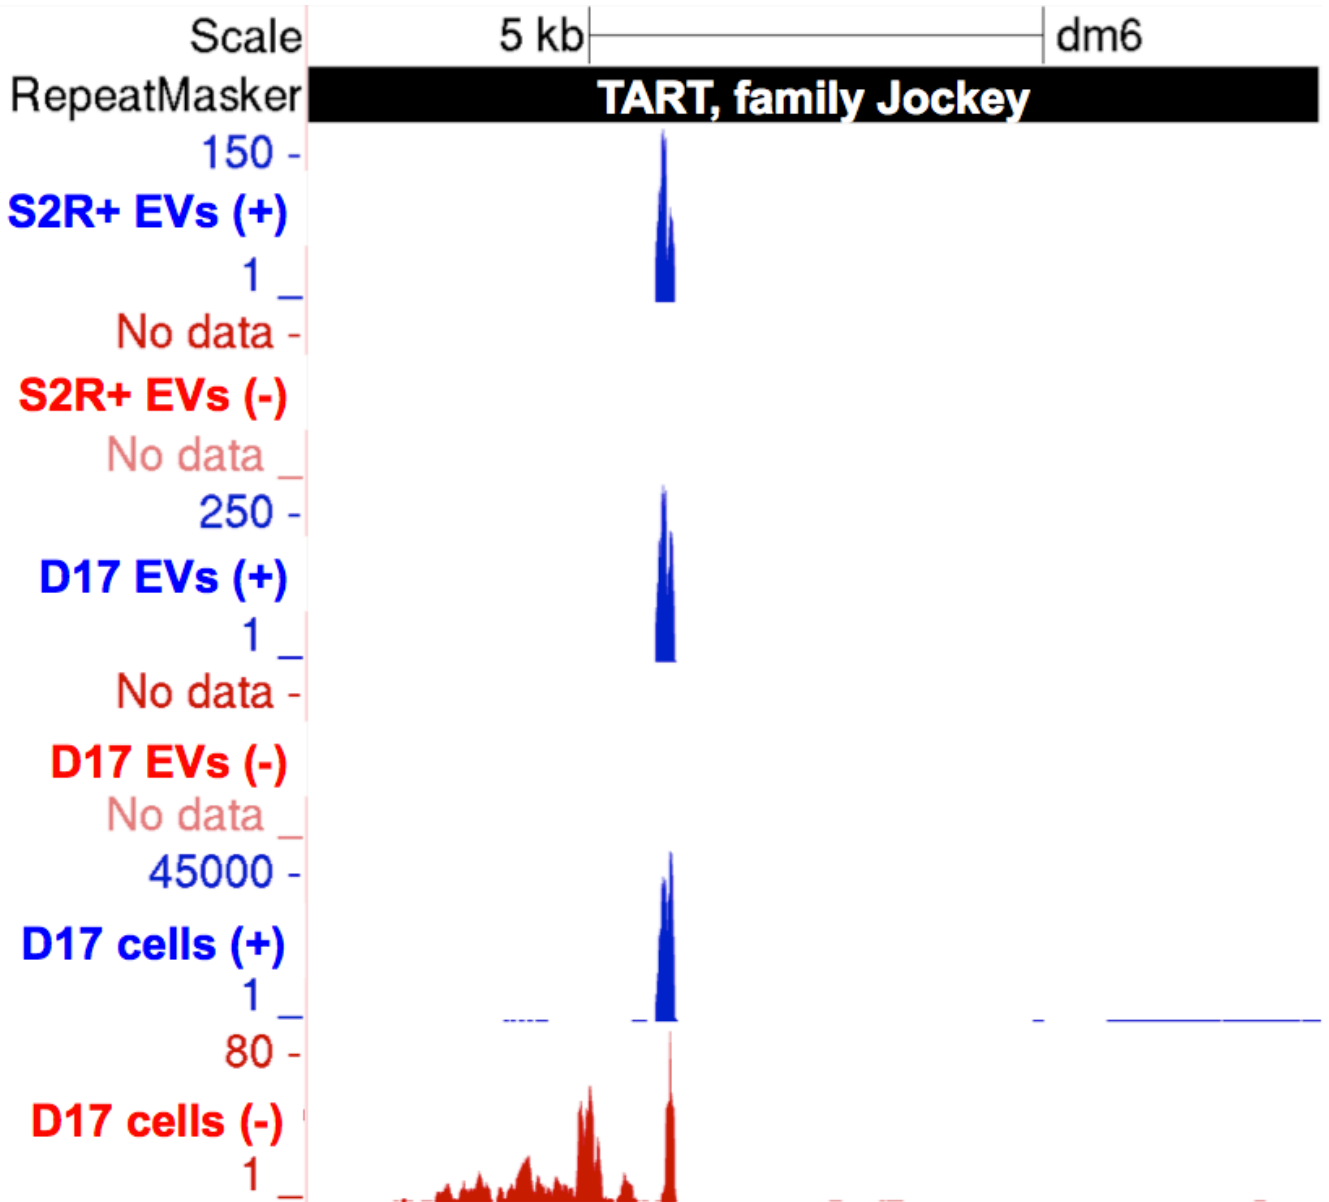

# Figure S14

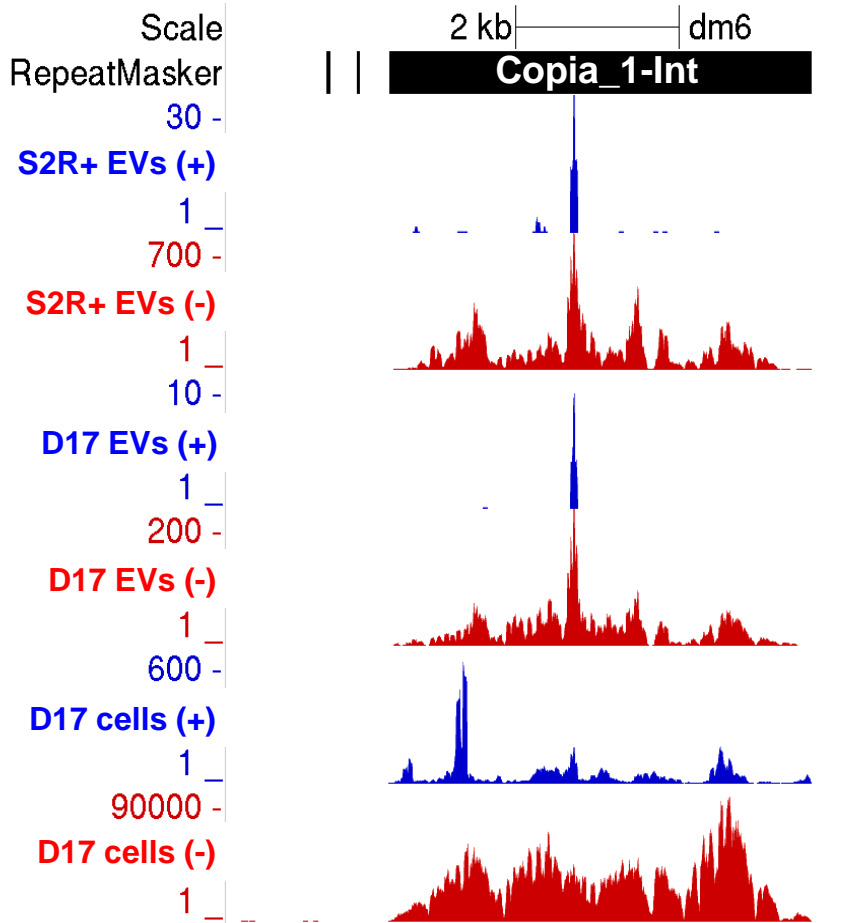

# Figure S15

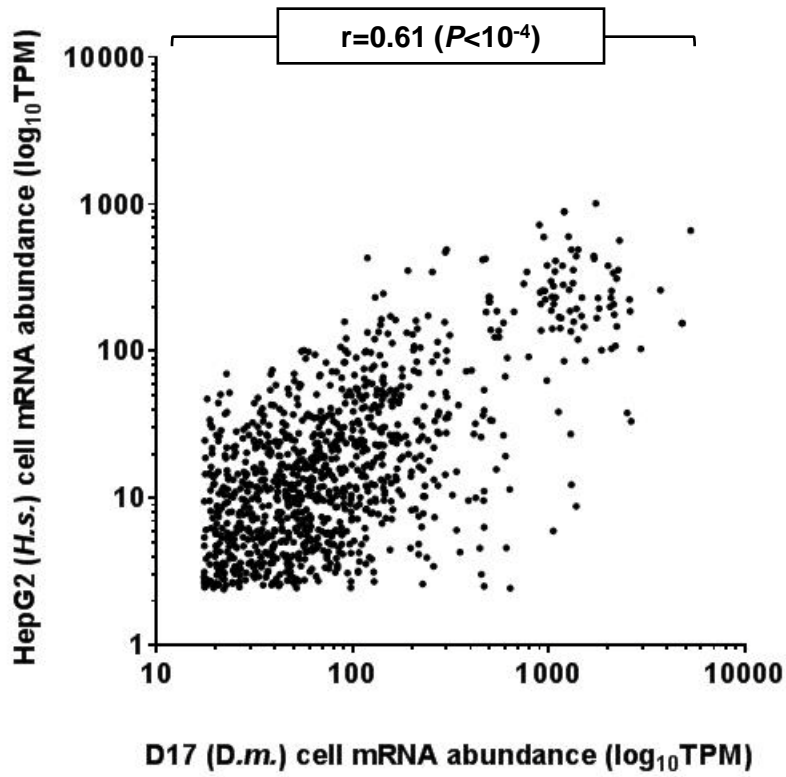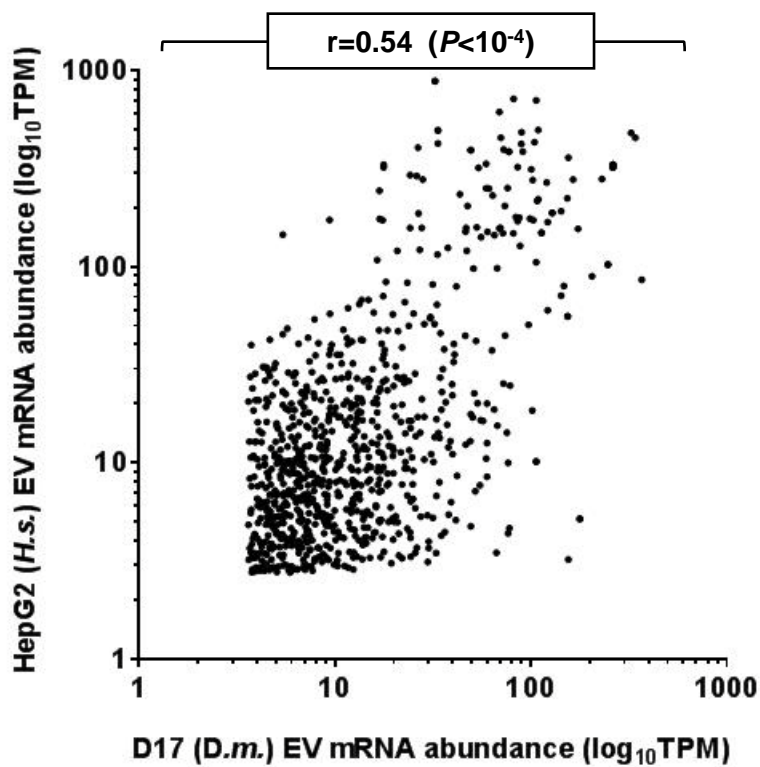

# Table S1

| ensembl_gene_id | gene_id   | A431 Evs | HepG2 Evs | HepG2 cells | Flybase ID  | Gene name        | S2R+ Evs | D17 Evs | D17 cell |
|-----------------|-----------|----------|-----------|-------------|-------------|------------------|----------|---------|----------|
| ENSG00000266658 | RNA28S5   | 18320021 | 16414483  | 853851      | FBgn0085797 | CR41540          | 5306258  | 3591189 | 295662   |
| ENSG00000272060 | RNA18S5   | 15308624 | 10290624  | 285306      | FBgn0085813 | CR41602          | 3517800  | 3380805 | 118729   |
| ENSG00000210082 | MT-RNR2   | 81302    | 396901    | 26866       | FBgn0085742 | CR40546          | 2429095  | 1567232 | 186204   |
| ENSG00000211459 | MT-RNR1   | 29807    | 276904    | 12367       | FBgn0085774 | CR40779          | 2260038  | 2136917 | 16865    |
| ENSG00000241335 | RNA5-8S5  | 77325    | 66110     | 138         | FBgn0085805 | CR41583          | 2106021  | 2505405 | 137649   |
| ENSG00000242716 | RNA5-8S5  | 77305    | 66095     | 191         | FBgn0085823 | CR41617          | 2092710  | 3075441 | 2922     |
| ENSG00000201925 | RNA5S15   | 10704    | 23295     | 4           | FBgn0085819 | CR41609          | 1596444  | 930954  | 134872   |
| ENSG00000200624 | RNA5S6    | 10313    | 23071     | 1           | FBgn0085773 | CR40766          | 1407175  | 726834  | 26546    |
| ENSG00000199910 | RNA5S10   | 10265    | 22870     | 1           | FBgn0085825 | CR41619          | 1344789  | 763627  | 4271     |
| ENSG00000199352 | RNA5S1    | 10554    | 23056     | 1           | FBgn0085807 | CR41590          | 868201   | 1204822 | 12725    |
| ENSG00000199337 | RNA5S3    | 10362    | 22704     | 0           | FBgn0085765 | CR40677          | 780867   | 816985  | 77306    |
| ENSG00000202257 | RNA5S16   | 10289    | 22646     | 1           | FBgn0085815 | CR41605          | 746258   | 1407179 | 6373     |
| ENSG00000199334 | RNA5S11   | 10052    | 22313     | 0           | FBgn0085757 | CR40621          | 588246   | 818844  | 10962    |
| ENSG00000199270 | RNA5S12   | 10487    | 22525     | 2           | FBgn0085743 | CR40560          | 560630   | 423825  | 27134    |
| ENSG00000201588 | RNA5S2    | 10323    | 22291     | 5           | FBgn0085769 | CR40728          | 472500   | 405368  | 1632     |
| ENSG00000202526 | RNA5S13   | 10111    | 22266     | 4           | FBgn0085817 | CR41607          | 423919   | 638905  | 3677     |
| ENSG00000200343 | RNA5S8    | 10221    | 22204     | 2           | FBgn0085764 | CR40668          | 405530   | 545564  | 148161   |
| ENSG00000202521 | RNA5S7    | 10236    | 22213     | 3           | FBgn0085796 | CR41539          | 379780   | 396090  | 4901     |
| ENSG00000201355 | RNA5S14   | 10259    | 22273     | 0           | FBgn0085822 | CR41613          | 376405   | 400427  | 3161     |
| ENSG00000199396 | RNA5S5    | 9988     | 21973     | 2           | FBgn0085795 | CR41535          | 375645   | 318151  | 62542    |
| ENSG00000200381 | RNA5S4    | 10216    | 21964     | 4           | FBgn0085761 | CR40642          | 372968   | 395060  | 3086     |
| ENSG00000200370 | RNA5S17   | 10105    | 21766     | 1           | FBgn0085759 | CR40640          | 287741   | 269986  | 2839     |
| ENSG00000201321 | RNA5S9    | 3951     | 5204      | 0           | FBgn0085770 | CR40734          | 263840   | 335867  | 56804    |
| ENSG00000199415 | RNA5SP370 | 2059     | 4456      | 0           | FBgn0085760 | CR40641          | 255087   | 304084  | 2777     |
| ENSG00000199523 | RNA5SP226 | 2045     | 4254      | 0           | FBgn0085828 | CR42195          | 231387   | 328168  | 3164     |
| ENSG00000199480 | RNA5SP357 | 1910     | 4096      | 0           | FBgn0085777 | CR40959          | 230728   | 256935  | 937      |
| ENSG00000199654 | RNA5SP389 | 1917     | 4070      | 0           | FBgn0085799 | CR41544          | 194809   | 250138  | 2754     |
| ENSG00000201185 | RNA5SP202 | 2002     | 3199      | 0           | FBgn0085771 | CR40741          | 190510   | 545404  | 115922   |
| ENSG00000199994 | RNA5SP145 | 630      | 1380      | 0           | FBgn0085766 | CR40679          | 164617   | 202766  | 11915    |
| ENSG00000201822 | RNA5SP149 | 262      | 475       | 0           | FBgn0085753 | CR40596          | 160787   | 144314  | 56757    |
| ENSG00000200741 | RNA5SP161 | 332      | 344       | 0           | FBgn0085758 | CR40639          | 118711   | 82604   | 3938     |
| ENSG00000252623 | RNA5SP481 | 165      | 278       | 0           | FBgn0085802 | CR41548          | 100029   | 100012  | 13876    |
| ENSG00000201861 | RNA5SP298 | 132      | 255       | 0           | FBgn0085737 | CR40502          | 39134    | 87148   | 402      |
| ENSG00000222806 | RNA5SP225 | 46       | 91        | 0           | FBgn0085767 | CR40685          | 23564    | 36117   | 22197    |
| ENSG00000266658 | RNA28S5   | 624      | 125       | 3           | FBgn0085772 | CR40743          | 23503    | 35637   | 1074     |
| ENSG00000201413 | RNA5SP141 | 18       | 45        | 0           | FBgn0250731 | 5.8SrRNA:CR40454 | 23359    | 35803   | 44       |
| ENSG00000200558 | RNA5SP429 | 25       | 45        | 0           | FBgn0085826 | CR41620          | 23276    | 35703   | 388      |
| ENSG00000202411 | RNA5SP259 | 21       | 34        | 0           | FBgn0085827 | CR41621          | 5352     | 9367    | 7148     |
| ENSG00000199564 | RNA5SP502 | 10       | 26        | 0           | FBgn0053394 | 5SrRNA:CR33394   | 2638     | 3443    | 60       |
| ENSG00000200278 | RNA5SP352 | 16       | 25        | 0           | FBgn0053435 | 5SrRNA:CR33435   | 2606     | 3258    | 54       |
| ENSG00000251705 | RNA5-8SP6 | 62       | 35        | 0           | FBgn0053358 | 5SrRNA:CR33358   | 2595     | 3264    | 66       |
| ENSG00000272351 | 5S_rRNA   | 10       | 9         | 0           | FBgn0053388 | 5SrRNA:CR33388   | 2595     | 3230    | 62       |
| ENSG00000199839 | RNA5SP150 | 6        | 8         | 0           | FBgn0053426 | 5SrRNA:CR33426   | 2557     | 3183    | 67       |
| ENSG00000200275 | RNA5SP199 | 7        | 8         | 0           | FBgn0053373 | 5SrRNA:CR33373   | 2556     | 3189    | 64       |
| ENSG00000201041 | RNA5SP242 | 4        | 5         | 0           | FBgn0053425 | 5SrRNA:CR33425   | 2554     | 3281    | 60       |
| ENSG00000201096 | RNA5SP387 | 2        | 4         | 0           | FBgn0053382 | 5SrRNA:CR33382   | 2546     | 2981    | 59       |
| ENSG00000200408 | RNA5SP74  | 1        | 3         | 0           | FBgn0053362 | 5SrRNA:CR33362   | 2545     | 3272    | 79       |
| ENSG00000200687 | RNA5SP335 | 7        | 4         | 0           | FBgn0053415 | 5SrRNA:CR33415   | 2519     | 2979    | 57       |
| ENSG00000202187 | RNA5SP355 | 5        | 5         | 0           | FBgn0053376 | 5SrRNA:CR33376   | 2505     | 3163    | 69       |
| ENSG00000200115 | RNA5SP440 | 0        | 2         | 0           | FBgn0053377 | 5SrRNA:CR33377   | 2494     | 3198    | 59       |

**Table S2**

| HepG2 exRNA ( <i>H.s.</i> ) |        |          | A431 exRNA ( <i>H.s.</i> ) |          |          |
|-----------------------------|--------|----------|----------------------------|----------|----------|
| Gene ID                     | Name   | Biotype  | Gene ID                    | Name     | Biotype  |
| ENSG00000265150             | RN7SL2 | misc_RNA | ENSG00000265150            | RN7SL2   | misc_RNA |
| ENSG00000258486             | RN7SL1 | misc_RNA | ENSG00000258486            | RN7SL1   | misc_RNA |
| ENSG00000201098             | RNY1   | misc_RNA | ENSG00000259001            | RPPH1    | lincRNA  |
| ENSG00000258486             | RN7SL1 | misc_RNA | ENSG00000269900            | RMRP     | lincRNA  |
| ENSG00000259001             | RPPH1  | lincRNA  | ENSG00000199990            | VTRNA1-1 | misc_RNA |
| ENSG00000266037             | RN7SL3 | misc_RNA | ENSG00000222328            | RNU2-2P  | snRNA    |
| ENSG00000198886             | MT-ND4 | mRNA     | ENSG00000200156            | RNU5B-1  | snRNA    |
| ENSG00000198712             | MT-CO2 | mRNA     | ENSG00000202538            | RNU4-2   | snRNA    |
| ENSG00000202198             | RN7SK  | misc_RNA | ENSG00000202198            | RN7SK    | misc_RNA |
| ENSG00000207142             | Y_RNA  | misc_RNA | ENSG00000263934            | SNORD3A  | snoRNA   |

| D17 exRNA ( <i>D.m.</i> ) |                     |         | S2R+ exRNA ( <i>D.m.</i> ) |                    |         |
|---------------------------|---------------------|---------|----------------------------|--------------------|---------|
| Gene ID                   | Name                | Biotype | Gene ID                    | Name               | Biotype |
| FBgn0003938               | snRNA:U5:63BC       | snRNA   | FBgn0082973                | snoRNA:Psi28S-3308 | snoRNA  |
| FBgn0085364               | CR34335             | lincRNA | FBgn0085364                | CR34335            | lincRNA |
| FBgn0058469               | CR40469             | lincRNA | FBgn0086659                | snoRNA:Psi18S-176  | snoRNA  |
| FBgn0085742               | CR40546             | lincRNA | FBgn0086667                | snoRNA:Psi28S-3342 | snoRNA  |
| FBgn0086659               | snoRNA:Psi18S-176   | snoRNA  | FBgn0002622                | RpS3               | mRNA    |
| FBgn0086667               | snoRNA:Psi28S-3342  | snoRNA  | FBgn0083057                | snoRNA:Psi18S-110  | snoRNA  |
| FBgn0065098               | RNaseMRP:RNA        | lincRNA | FBgn0000556                | Ef1alpha48D        | mRNA    |
| FBgn0082973               | snoRNA:Psi28S-3308  | snoRNA  | FBgn0058469                | CR40469            | lincRNA |
| FBgn0083057               | snoRNA:Psi18S-110   | snoRNA  | FBgn0261602                | RpL8               | mRNA    |
| FBgn0083040               | snoRNA:Psi18S-1854c | snoRNA  | FBgn0066084                | RpL41              | mRNA    |

### Table S3

| HepG2 exRNA ( <i>H.s.</i> ) |                                      | A431 exRNA ( <i>H.s.</i> ) |                                      | D17 exRNA ( <i>D.m.</i> ) |                                     | S2R+ exRNA ( <i>D.m.</i> ) |                                     |
|-----------------------------|--------------------------------------|----------------------------|--------------------------------------|---------------------------|-------------------------------------|----------------------------|-------------------------------------|
| Name                        | Coordinates                          | Name                       | Coordinates                          | Name                      | Coordinates                         | Name                       | Coordinates                         |
| THE1C-int7700               | chr5:<br>71,145,492-<br>71,146,744   | THE1C-int7700              | chr5:<br>71,145,492-<br>71,146,744   | TART                      | chrX:<br>15,069-<br>26,164          | Copia_I-int39252           | chr2L:<br>22,201,683-<br>22,206,275 |
| HERVK-int980                | chr2:<br>230,045,354-<br>230,045,487 | L1PA227648                 | chrX:<br>108,297,820-<br>108,302,024 | (AT)n                     | chrX:<br>3,439,872-<br>3,439,921    | DIVER2_I-<br>int16214      | chr3R:<br>1,283,864-<br>1,286,948   |
| 7SLRNA2870                  | chr14:<br>50,329,267-<br>50,329,567  | HERVK-int980               | chr2:<br>230,045,354-<br>230,045,487 | (CAAT)<br>n               | chr2R:<br>10,245,859-<br>10,245,899 | TART57386                  | chrX:<br>15,069-<br>26,164          |
| 7SLRNA2827                  | chr14:<br>50,053,297-<br>50,053,597  | HERVK-<br>int25623         | chr19:<br>36,063,339-<br>36,066,505  | (T)n                      | chr3R:<br>19,555,771-<br>19,555,805 | Gypsy2-<br>LTR_DM969       | chr2L:<br>22,427,715-<br>22,428,019 |
| L1PA227648                  | chrX:<br>108,297,820-<br>108,302,024 | 7SLRNA2827                 | chr14:<br>50,053,297-<br>50,053,597  | Copia_I-<br>int           | chr3L:<br>2,108,581-<br>2,113,175   | TC1-2_DM11645              | chr2R:<br>1,650,689-<br>1,652,229   |
| tRNA-Lys-<br>AAG558         | chr19:<br>36,066,749-<br>36,066,825  | tRNA-Lys-<br>AAG558        | chr19:<br>36,066,749-<br>36,066,825  | Copia_I-<br>int           | chr2L:<br>20,159,291-<br>20,163,993 | (CAG)n318                  | chr3R:<br>26,032,306-<br>26,032,414 |
| MER21C370                   | chr1:<br>91,852,712-<br>91,852,785   | 7SLRNA2870                 | chr14:<br>50,329,267-<br>50,329,567  | (CA)n                     | chrX:<br>16,147,995-<br>16,148,061  | DM297_I-int35675           | chr3R:<br>11,066,820-<br>11,070,826 |
| L1PA218775                  | chr5:<br>71,146,942-<br>71,150,001   | L1PA101524                 | chr21:<br>9,827,578-<br>9,827,850    | Copia_I-<br>int           | chr2L:<br>11,563,967-<br>11,568,561 | SAR_DM2740                 | chr3R:<br>25,142,562-<br>25,144,328 |
| L1PA101524                  | chr21:<br>9,827,578-<br>9,827,850    | L1PA218775                 | chr5:<br>71,146,942-<br>71,150,001   | Copia_I-<br>int           | chr2L:<br>17,820,252-<br>17,824,847 | (AT)n18                    | chrX:<br>3,439,872-<br>3,439,921    |
| L1PA325725                  | chr1:<br>145,277,249-<br>145,277,491 | MER21C370                  | chr1:<br>91,852,712-<br>91,852,785   | Copia_I-<br>int           | chr2L:<br>14,804,210-<br>14,808,803 | OSVALDO_I-<br>int617       | chr3R:<br>1,451,474-<br>1,451,728   |

**Table S4**

| HepG2 exRNA ( <i>H.s.</i> ) |         | A431 exRNA ( <i>H.s.</i> ) |         |
|-----------------------------|---------|----------------------------|---------|
| Transcript ID               | Name    | Transcript ID              | Name    |
| ENSG00000198886             | MT-ND4  | ENSG00000198938            | MT-CO3  |
| ENSG00000198712             | MT-CO2  | ENSG00000198886            | MT-ND4  |
| ENSG00000198804             | MT-CO1  | ENSG00000198712            | MT-CO2  |
| ENSG00000198938             | MT-CO3  | ENSG00000212907            | MT-ND4L |
| ENSG00000087086             | FTL     | ENSG00000198899            | MT-ATP6 |
| ENSG00000212907             | MT-ND4L | ENSG00000198804            | MT-CO1  |
| ENSG00000198899             | MT-ATP6 | ENSG00000198888            | MT-ND1  |
| ENSG00000198888             | MT-ND1  | ENSG00000228253            | MT-ATP8 |
| ENSG00000228253             | MT-ATP8 | ENSG00000198727            | MT-CYB  |
| ENSG00000198786             | MT-ND5  | ENSG00000034510            | TMSB10  |

| D17 exRNA ( <i>D.m.</i> ) |             | S2R+ exRNA ( <i>D.m.</i> ) |             |
|---------------------------|-------------|----------------------------|-------------|
| Transcript ID             | Name        | Transcript ID              | Name        |
| FBgn0033926               | Arc1        | FBgn0002622                | RpS3        |
| FBgn0066084               | RpL41       | FBgn0000556                | Ef1alpha48D |
| FBgn0261619               | pAbp        | FBgn0261602                | RpL8        |
| FBgn0003274               | RpLP2       | FBgn0066084                | RpL41       |
| FBgn0000042               | Act5C       | FBgn0039757                | RpS7        |
| FBgn0032987               | RpL21       | FBgn0032987                | RpL21       |
| FBgn0013674               | mt:CoI      | FBgn0000559                | Ef2b        |
| FBgn0013675               | mt:CoII     | FBgn0035422                | RpL28       |
| FBgn0001233               | Hsp83       | FBgn0026372                | RpL23A      |
| FBgn0000556               | Ef1alpha48D | FBgn0023170                | RpL39       |

**Table S5**

| HepG2 exRNA ( <i>H.s.</i> )        |             | A431 exRNA ( <i>H.s.</i> )         |             |
|------------------------------------|-------------|------------------------------------|-------------|
| GO term                            | FDR q-value | GO term                            | FDR q-value |
| translational elongation           | 1.10E-69    | translational elongation           | 4.00E-81    |
| cytosolic ribosome                 | 1.30E-56    | cytosolic ribosome                 | 1.30E-68    |
| structural constituent of ribosome | 1.70E-49    | ribosomal subunit                  | 1.80E-60    |
| ribosomal subunit                  | 4.30E-48    | structural constituent of ribosome | 5.20E-59    |
| cytosolic part                     | 2.60E-46    | ribosome                           | 1.80E-57    |
| ribosome                           | 1.00E-45    | cytosolic part                     | 2.20E-55    |
| translation                        | 1.30E-42    | translation                        | 4.00E-50    |
| ribonucleoprotein complex          | 7.20E-42    | ribonucleoprotein complex          | 2.70E-45    |
| cytosol                            | 1.20E-36    | cytosol                            | 1.40E-43    |
| cytosolic small ribosomal subunit  | 2.10E-28    | structural molecule activity       | 2.30E-42    |

| D17 exRNA ( <i>D.m.</i> )          |             | S2R+ exRNA ( <i>D.m.</i> )         |             |
|------------------------------------|-------------|------------------------------------|-------------|
| GO term                            | FDR q-value | GO term                            | FDR q-value |
| cytosolic ribosome                 | 7.90E-64    | cytosolic ribosome                 | 1.70E-63    |
| cytosolic part                     | 5.20E-57    | cytosolic part                     | 2.90E-59    |
| structural constituent of ribosome | 6.00E-55    | mitotic spindle elongation         | 9.10E-47    |
| ribosomal subunit                  | 2.10E-47    | spindle elongation                 | 1.40E-46    |
| ribosome                           | 2.90E-45    | structural constituent of ribosome | 1.50E-45    |
| mitotic spindle elongation         | 7.40E-43    | cytosolic large ribosomal subunit  | 1.20E-44    |
| spindle elongation                 | 1.00E-42    | ribosomal subunit                  | 1.60E-36    |
| cytosolic large ribosomal subunit  | 9.60E-41    | ribosome                           | 1.20E-33    |
| lipid particle                     | 8.40E-39    | lipid particle                     | 1.00E-32    |
| ribonucleoprotein complex          | 2.60E-37    | mitotic spindle organization       | 2.10E-31    |



**Table S6**

| HepG2           |         |
|-----------------|---------|
| Gene ID         | Name    |
| ENSG00000213741 | RPS29   |
| ENSG00000156508 | EEF1A1  |
| ENSG00000163631 | ALB     |
| ENSG00000084674 | APOB    |
| ENSG00000130167 | TSPAN16 |

| D17         |          |             |         |
|-------------|----------|-------------|---------|
| Gene ID     | Name     | Gene ID     | Name    |
| FBgn0034770 | Obp58d   | FBgn0052774 | Muc4B   |
| FBgn0005640 | Eip63E   | FBgn0038919 | CG17843 |
| FBgn0011288 | Snap25   | FBgn0000721 | for     |
| FBgn0262098 | CG42851  | FBgn0038508 | CG5866  |
| FBgn0052214 | CG32214  | FBgn0030926 | psh     |
| FBgn0040950 | Muc26B   | FBgn0035436 | CG12016 |
| FBgn0032313 | CG14070  | FBgn0038449 | CG17562 |
| FBgn0032851 | CG13970  | FBgn0036226 | CG7252  |
| FBgn0038078 | CG14391  | FBgn0038979 | CG7046  |
| FBgn0085488 | CG34459  | FBgn0063485 | Lasp    |
| FBgn0053554 | Nipped-A | FBgn0263780 | CG17684 |
| FBgn0038733 | CG11407  |             |         |
| FBgn0264395 | CG43843  |             |         |
